# Supplementary material for: Characteristics and Limitations of Video-capillaroscopy in Reconstructive Microsurgery for Different Histologic Components of Flaps
Source: PubMed Central journal article supplement — Plast Reconstr Surg Glob Open. 2022 Nov 1;10(11):e4583. doi: 10.1097/GOX.0000000000004583 (PMC9624496; doi:10.1097/gox.0000000000004583), 2022-11-01

The donor and recipient observation points were divided evenly into four areas, and the each central ★ mark point was observed with Video-capillaroscopy

Donor site observation point

- ★ skin papillary
- ★ adipose tissue papillary
- ★ Muscle
- ★ Fascia
- ★ De-epi skin
- Perforator

Recipient site observation point

- ★ skin papillary
- ★ Bone periosteum
- ★ Muscle
- ★ Adipose tissue papillary

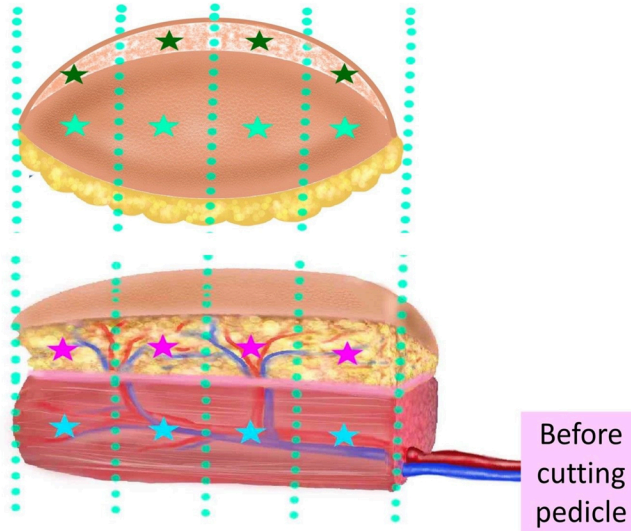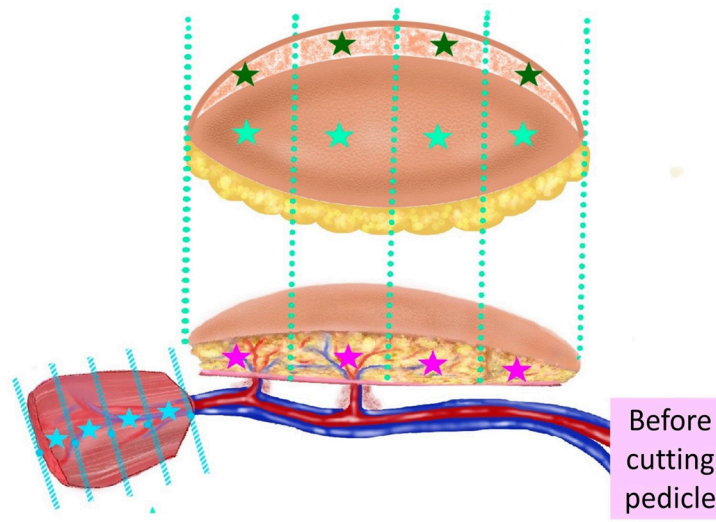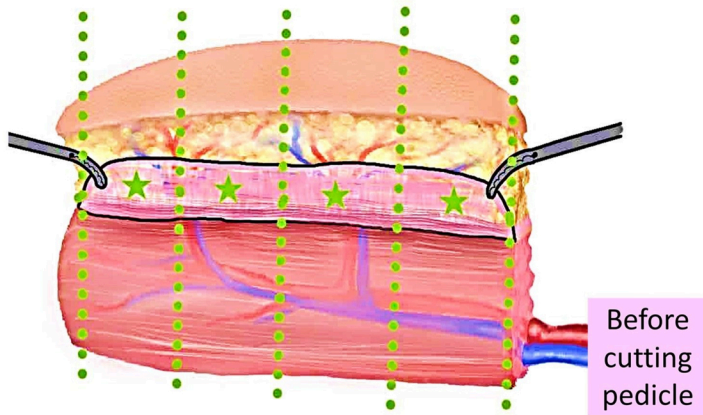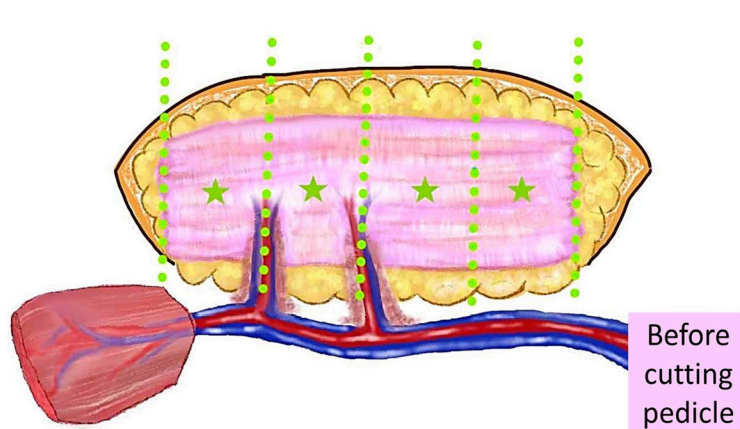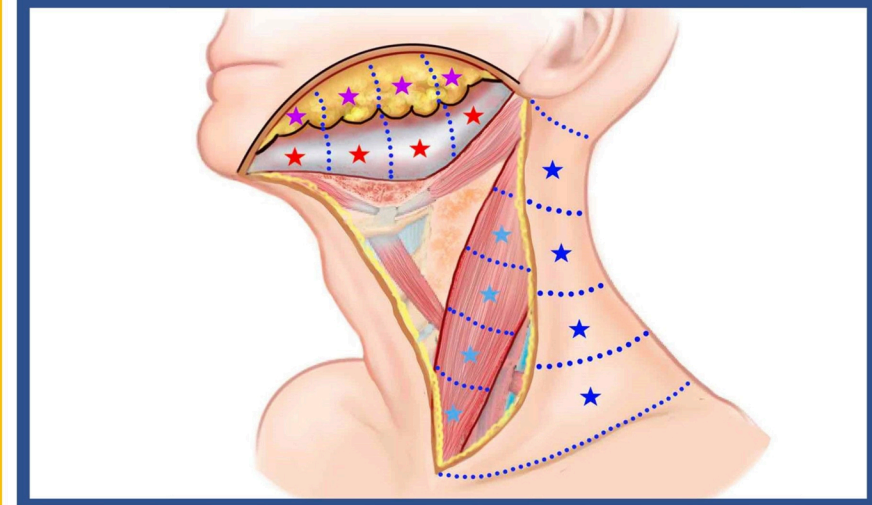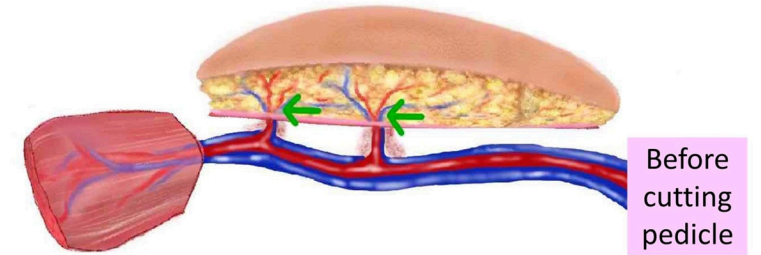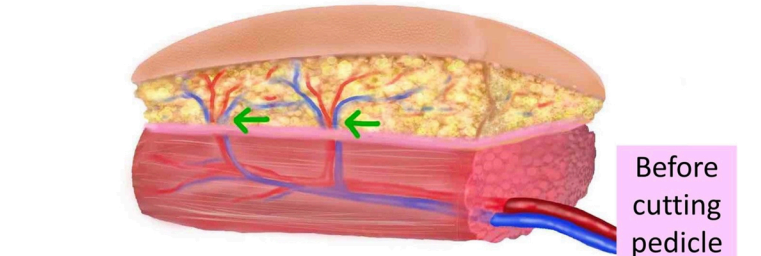

Supplement: gox-10-e4583-s002.pdf [file gox-10-e4583-s002.pdf]
